# Supplementary material
Source: PubMed Central journal article supplement (PMC4666704)

Electronic supporting information for

## Correlating antimicrobial activity and model membrane leakage induced by nylon-3 polymers and detergents

Sara G. Hovakeemian, Runhui Liu, Samuel H. Gellman, and Heiko Heerklotz (2015)

Fig ESI-1 shows the leakage curves and molecular structures for the detergents considered in Tab. 2.

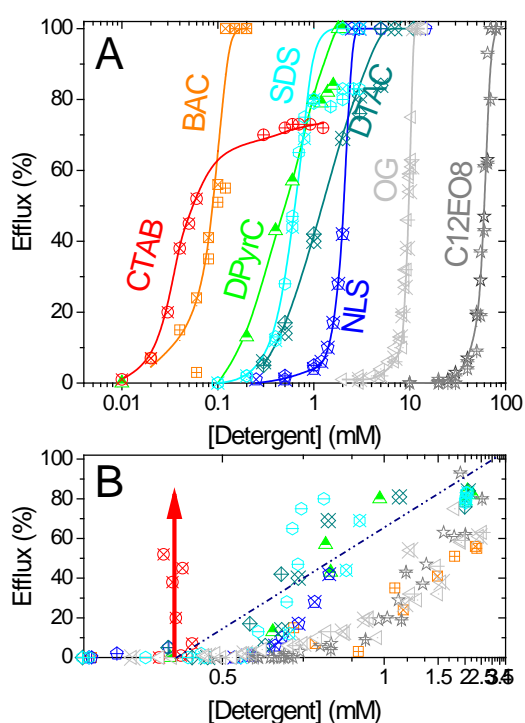

**Figure ESI-1:** Leakage data of Cetyl Trimethyl Ammonium Bromide (CTAB), Sodium Dodecyl Sulfate (SDS), N-Lauroyl Sarcosine (Sodium Salt) (NLS), Benzalkonium chloride (BAC), 1-Dodecylpyridinium chloride hydrate (DPyrC), n-Octyl- $\beta$ -D-glucopyranoside (OG), and Octaethylene Glycol Monododecyl Ether (C12EO8) acting on 30  $\mu$ M YPLE vesicles; different symbols of the same color represent independent measurements. Panel A shows the dye efflux after 1 hour as a function of detergent concentration. Panel B shows efflux as a function of the fluorescence lifetime of entrapped dye,  $\tau_e$ , on a reciprocal scale. The red arrow represents all-or-none leakage induced by CTAB.

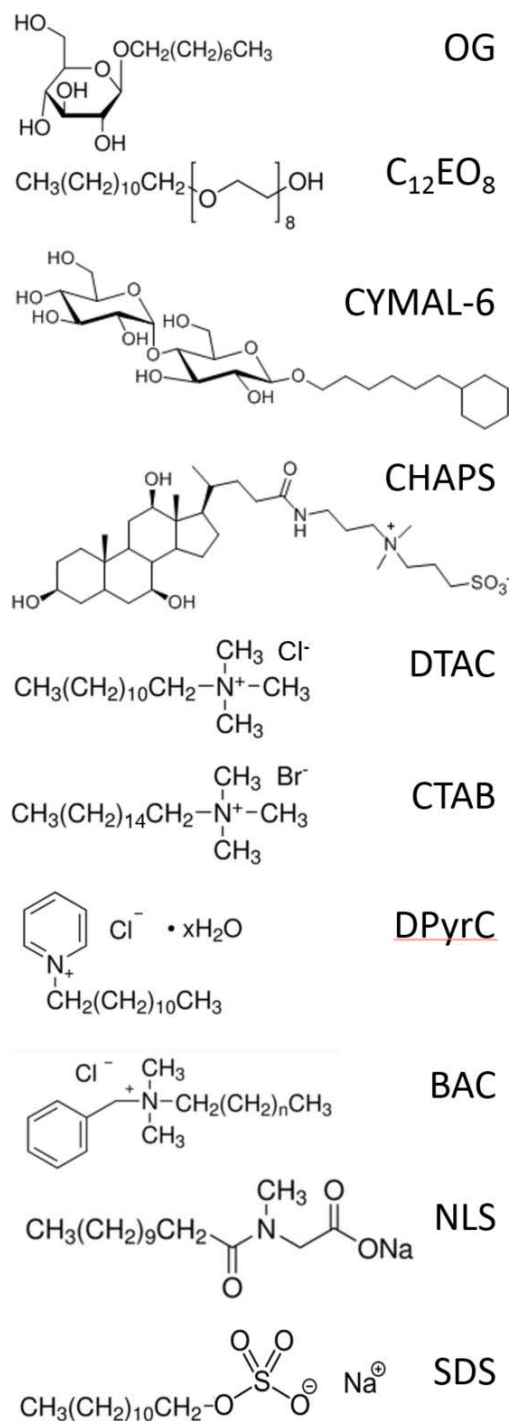

Supplement: NIHMS712940-supplement-ESI.pdf [file NIHMS712940-supplement-ESI.pdf]
